# Supplementary material for: Systematic Review and Meta-Analysis of Efficiency and Safety of Double-Lumen Tube and Bronchial Blocker for One-Lung Ventilation
Source: MDPI journal article supplement (doi:10.3390/jcm12051877), 2023-02-27
Supplement: s1 [file s1]

# Systematic Review and Meta-Analysis of Efficiency and Safety of Double-Lumen Tube and Bronchial Blocker for One-Lung Ventilation

## Supplementary Digital File

### CONTENT:

|                                                                                                                                |   |
|--------------------------------------------------------------------------------------------------------------------------------|---|
| Table S1: Pooled analysis of baseline patients characteristics.....                                                            | 2 |
| Figure S1: A summary table of re-view authors' judgements for each risk of bias item for each randomized study .....           | 3 |
| Figure S2: A plot of the distribution of review authors' judgements across randomized studies for each risk of bias item. .... | 4 |

**Table S1:** Pooled analysis of baseline patients characteristics

| Adverse event   | No. of studies | Event / Participants or MD (SD) |                 | Events   |               | Heterogeneity between Trials |                           | p-Value for Differences across Groups |
|-----------------|----------------|---------------------------------|-----------------|----------|---------------|------------------------------|---------------------------|---------------------------------------|
|                 |                | DLT                             | BB              | OR or MD | 95%CI         | p-Value                      | I <sup>2</sup> statistics |                                       |
| Age             | 19             | 54.8 (12.9)                     | 56.7 (12.8)     | -0.23    | -1.72 to 1.26 | <0.001                       | 71%                       | 0.76                                  |
| Sex, male       | 17             | 358/582 (61.5%)                 | 392/648 (60.5%) | 1.05     | 0.83 to 1.33  | 0.96                         | 0%                        | 0.69                                  |
| Body mass index | 10             | 26.2 (5.9)                      | 25.8 (6.3)      | 0.30     | -0.68 to 1.29 | <0.001                       | 71%                       | 0.55                                  |
| ASA             |                |                                 |                 |          |               |                              |                           |                                       |
| 1 class         | 8              | 81/323 (25.1%)                  | 77/316 (24.4%)  | 1.09     | 0.71 to 1.65  | 0.60                         | 0%                        | 0.70                                  |
| 2 class         | 8              | 122/323 (37.8%)                 | 121/316 (38.3%) | 0.97     | 0.67 to 1.42  | 0.63                         | 0%                        | 0.89                                  |
| 3 class         | 8              | 108/323 (33.4%)                 | 105/316 (33.2%) | 0.97     | 0.57 to 1.66  | 0.86                         | 0%                        | 0.92                                  |
| 4 class         | 8              | 12/323 (3.7%)                   | 12/316 (4.1%)   | 0.96     | 0.42 to 2.19  | 0.70                         | 0%                        | 0.92                                  |

*Legend: ASA: American Society of Anesthesiologists classification; BB: bronchial blocker; CI: confidence interval; DLT: double lumen tube; MD: mean difference; OR: odds ratio*

|       | Risk of bias domains      |    |    |    |    |         |
|-------|---------------------------|----|----|----|----|---------|
|       | D1                        | D2 | D3 | D4 | D5 | Overall |
| Study | Bauer et al. 2001         | +  | -  | +  | +  | +       |
|       | Bussieres et al. 2016     | +  | +  | +  | +  | +       |
|       | Campos et al. 1996        | +  | +  | -  | +  | +       |
|       | Campos et al. 1998        | +  | +  | -  | +  | +       |
|       | Campos et al. 2003        | +  | +  | -  | +  | +       |
|       | Campos et al. 2012        | +  | +  | -  | +  | +       |
|       | Cheng et al. 2019         | +  | +  | -  | +  | +       |
|       | Dumans-Nizard et al. 2009 | +  | +  | +  | +  | +       |
|       | Grocott et al. 2003       | +  | +  | +  | +  | +       |
|       | Knoll et al. 2006         | +  | +  | +  | +  | +       |
|       | Liu et al. 2020           | +  | +  | +  | +  | +       |
|       | Lu et al. 2018            | +  | +  | X  | +  | +       |
|       | Morris et al. 2021        | +  | +  | +  | +  | +       |
|       | Mourisse et al. 2013      | +  | +  | +  | +  | +       |
|       | Narayanaswamy et al. 2009 | +  | +  | +  | +  | +       |
|       | Niu et al. 2018           | +  | +  | +  | +  | +       |
|       | Ren et al. 2021           | +  | +  | +  | +  | +       |
|       | Risse et al. 2022         | +  | +  | +  | +  | +       |
|       | Ruetzler et al. 2011      | +  | +  | +  | +  | +       |
|       | Shaban et al. 2019        | +  | +  | +  | +  | +       |
|       | Xu et al. 2021            | +  | +  | +  | +  | +       |
|       | Yoo et al. 2014           | +  | +  | +  | +  | +       |
|       | Yoo et al. 2019           | +  | +  | +  | +  | +       |
|       | Zhang et al. 2020         | +  | +  | X  | +  | +       |
|       | Zhong et al. 2009         | +  | +  | X  | +  | +       |

Domains:  
D1: Bias arising from the randomization process.  
D2: Bias due to deviations from intended intervention.  
D3: Bias due to missing outcome data.  
D4: Bias in measurement of the outcome.  
D5: Bias in selection of the reported result.

Judgement  
X High  
- Some concerns  
+ Low

**Figure S1:** A summary table of re-view authors' judgements for each risk of bias item for each randomized study

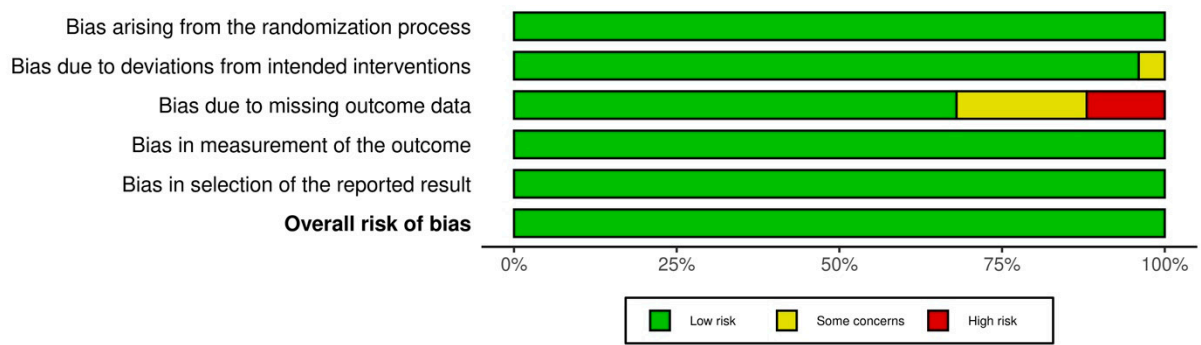

**Figure S2:** A plot of the distribution of review authors' judgements across randomized studies for each risk of bias item.
